# Supplementary material for: Ultrasound-Assisted Extraction of Applewood Polyphenols at Lab and Pilot Scales
Source: MDPI journal article supplement (doi:10.3390/foods12173142), 2023-08-22
Supplement: s1 [file s1]

Table 1 S: HPLC calibration parameters of phenolic compound standards

| Compound                  | Retention<br>time<br>(min) | Wavelength<br>(nm) | Linear<br>range<br>(mg/L) | Slope<br>(mAU.L/mg) | Intercept<br>(mAU) | Correlation<br>coefficient<br>(R <sup>2</sup> ) | Limit of<br>detection<br>(mg/L) | Limit of<br>quantification<br>(mg/L) |
|---------------------------|----------------------------|--------------------|---------------------------|---------------------|--------------------|-------------------------------------------------|---------------------------------|--------------------------------------|
| Gallic acid               | 5.49                       | 260                | 1.00 – 50.2               | 0.02168             | -0.01041           | 0.9998                                          | 0.076                           | 0.25                                 |
| Procyanidin B1            | 9.07                       | 280                | 1.00 – 50.0               | 0.006338            | -0.003927          | 0.9991                                          | 0.086                           | 0.29                                 |
| (+)-Catechin              | 12.04                      | 280                | 2.00 - 100                | 0.006072            | -0.001217          | 0.9999                                          | 0.045                           | 0.15                                 |
| Procyanidin B2            | 13.43                      | 280                | 1.00 – 50.0               | 0.005306            | -0.002393          | 0.9994                                          | 0.048                           | 0.16                                 |
| Chlorogenic acid          | 15.79                      | 320                | 0.99 – 49.4               | 0.02538             | -0.001921          | 0.9999                                          | 0.050                           | 0.17                                 |
| Vanillic acid             | 16.63                      | 260                | 1.02 – 51.0               | 0.03216             | -0.004669          | 0.9999                                          | 0.070                           | 0.23                                 |
| (-)-Epicatechin           | 18.20                      | 280                | 0.98 – 49.2               | 0.005975            | -0.003548          | 0.9998                                          | 0.80                            | 2.65                                 |
| <i>p</i> -Coumaric acid   | 24.24                      | 290                | 1.00 – 50.2               | 0.06049             | -0.009602          | 0.9999                                          | 0.029                           | 0.098                                |
| Epicatechin gallate       | 24.37                      | 280                | 1.11 – 55.5               | 0.01550             | -0.008321          | 0.9997                                          | 0.20                            | 0.66                                 |
| Naringin                  | 34.13                      | 280                | 1.07 – 53.4               | 0.01469             | -0.002246          | 0.9999                                          | 0.067                           | 0.22                                 |
| Quercetin 3-D-galactoside | 35.73                      | 260                | 1.00 – 50.0               | 0.05722             | -0.009052          | 0.9999                                          | 0.039                           | 0.13                                 |
| Phloridzin                | 38.00                      | 280                | 2.01 – 101                | 0.01800             | -0.003294          | 0.9999                                          | 0.023                           | 0.078                                |
| Avicularin                | 40.29                      | 260                | 1.00 – 50.0               | 0.02438             | -0.004669          | 0.9999                                          | 0.048                           | 0.16                                 |
| Kaempferol 3-O-glucoside  | 41.88                      | 260                | 1.00 – 50.0               | 0.02372             | -0.003494          | 0.9999                                          | 0.030                           | 0.10                                 |
| <i>t</i> -Cinnamic acid   | 43.03                      | 280                | 0.49 – 24.6               | 0.07593             | -0.005454          | 0.9999                                          | 0.039                           | 0.13                                 |
| Naringenin                | 47.97                      | 290                | 0.80 – 40.0               | 0.008192            | -0.001389          | 0.9999                                          | 0.035                           | 0.12                                 |
| Quercetin                 | 48.70                      | 360                | 1.87 – 93.4               | 0.02998             | -0.02244           | 0.9998                                          | 0.19                            | 0.62                                 |
| Phloretin                 | 50.45                      | 280                | 0.90 – 45.2               | 0.03245             | -0.004946          | 0.9999                                          | 0.056                           | 0.18                                 |
| Daidzein                  | 44.32                      | 260                | ISTD*                     | -                   | -                  | -                                               | -                               | -                                    |

\*ISTD = Internal Standard
